# Supplementary material
Source: HighWire-hosted journal article supplement (https://bmjopenquality.bmj.com/content/10/1/e001183)
Supplement: inline-supplementary-material-1 [file inline-supplementary-material-1.pdf]

**APPENDIX****Appendix 1 Invitees per group invited from two hospitals at 1st SAQ survey**

|                                                              | Hospital 1 <sup>1</sup> | Hospital 2 <sup>2</sup> |
|--------------------------------------------------------------|-------------------------|-------------------------|
|                                                              | N                       | N                       |
| Instructors                                                  | 21                      | 18                      |
| Medical doctors                                              | 29                      | 86                      |
| Critical care - nurses                                       | 80                      | 41                      |
| Anaesthesia - doctors                                        | 24                      | 26                      |
| Anaesthesia - nurses                                         | 36                      | 43                      |
| Midwives                                                     | 84                      |                         |
| Gynaecology - doctors                                        | 31                      |                         |
| Orthopaedic surgery (Operating room nurses)                  | 29                      |                         |
| Gynaecological and abdominal surgery (Operating room nurses) | 26                      |                         |
| Radiographers                                                | 33                      |                         |
| Emergency room - nurses                                      | 52                      | 23                      |
| Emergency department - nurses                                | 71                      |                         |
| Emergency visitations unit - nurses                          |                         | 33                      |
| Oncology - doctors                                           |                         | 43                      |
| Oncology - nurses                                            |                         | 27                      |
| Cardiology - doctors                                         |                         | 19                      |
| Cardiology - nurses                                          |                         | 40                      |
| Cardiology - doctors <sup>3</sup>                            |                         | 10                      |
| Cardiology - nurses <sup>3</sup>                             |                         | 42                      |
| <b>Total number of invitees at 1<sup>st</sup> SAQ-survey</b> | <b>516</b>              | <b>451</b>              |

**Notes:**

1: Hospital 1 mainly handles acute care

2: Hospital 2 mainly handles elective functions

3: Physically at Hospital 1, but handles acute care functions
